# Supplementary material for: Development and validation of a mental health screening tool for asylum-seekers and refugees: the STAR-MH
Source: Springer Nature journal article supplement (doi:10.1186/s12888-018-1660-8), 2018-03-16
Supplement: MOESM1 [file 15542464]

**Table S1***Demographic and clinical variables of participants (N=192)*

|                                                          | <i>N</i> <sup>a</sup> (%) <sup>b</sup> |
|----------------------------------------------------------|----------------------------------------|
| <b>Gender</b>                                            |                                        |
| Male                                                     | 134 (69.8)                             |
| <b>Age group</b>                                         |                                        |
| 18-24                                                    | 24 (12.5)                              |
| 25-34                                                    | 79 (41.1)                              |
| 35-44                                                    | 49 (25.5)                              |
| 45-54                                                    | 28 (14.6)                              |
| 55+                                                      | 12 (6.3)                               |
| <b>Marital status</b>                                    |                                        |
| Partnered                                                | 117 (60.9)                             |
| <b>Mode of Arrival</b>                                   |                                        |
| Irregular maritime arrival                               | 104 (54.2)                             |
| <b>Continent of Origin (UN geoscheme)</b>                |                                        |
| Africa                                                   |                                        |
| East Africa                                              | 17 (9.1)                               |
| North Africa                                             | 10 (5.3)                               |
| West Africa                                              | 7 (3.7)                                |
| Asia                                                     |                                        |
| South Asia                                               | 97 (51.9)                              |
| South-East Asia                                          | 39 (20.9)                              |
| West Asia                                                | 8 (4.3)                                |
| Other                                                    | 9 (4.7)                                |
| <b>Interpreter required</b>                              |                                        |
| Yes (screening)                                          | 118 (61.5)                             |
| Yes (interview)                                          | 125 (65.1)                             |
| <b>Pre-migration camp/detention</b>                      |                                        |
| Yes                                                      | 28 (14.8)                              |
| <b>Post-migration Immigration Detention</b>              |                                        |
| Yes                                                      | 105 (54.7)                             |
| <b>Years in Australia</b>                                |                                        |
| < 1 year                                                 | 36 (19.0)                              |
| 1-2 years                                                | 34 (18.0)                              |
| 2-3 years                                                | 79 (41.8)                              |
| > 3 years                                                | 40 (21.2)                              |
| <b>Residency status</b>                                  |                                        |
| Temporary Visa (Asylum-seeker)                           | 187 (97.4)                             |
| Permanent Residency (Refugee)                            | 5 (2.6)                                |
| <b>Mental health diagnosis (Australia)</b>               |                                        |
| Yes                                                      | 8 (4.4)                                |
| <b>Post-traumatic stress disorder (PTSD)<sup>c</sup></b> |                                        |

|                                        |           |
|----------------------------------------|-----------|
| Yes                                    | 38 (19.9) |
| <b>Major depressive disorder (MDD)</b> |           |
| Yes                                    | 57 (29.7) |
| <b>Either PTSD or MDD</b>              |           |
| Yes                                    | 62 (32.3) |

---

<sup>a</sup> Total *ns* may be less than 192 due to missing data

<sup>b</sup> Refers to valid percentage, excluding missing data.

<sup>c</sup> *n* = 191.
