# Supplementary material for: Development and validation of a mental health screening tool for asylum-seekers and refugees: the STAR-MH
Source: Springer Nature journal article supplement (doi:10.1186/s12888-018-1660-8), 2018-03-16
Supplement: MOESM2 [file 15542464]

**Table S2***Response frequencies for STAR-MH items<sup>a, b</sup>*

| <b>Item</b>                                                  | <b>Missing</b> | <b>Yes</b>                | <b>No</b>                 |
|--------------------------------------------------------------|----------------|---------------------------|---------------------------|
|                                                              | <i>n</i> (%)   | <i>n</i> (%) <sup>a</sup> | <i>n</i> (%) <sup>a</sup> |
| 3. Have you felt very restless, like you can't keep still?   | 0 (0.0%)       | 56 (29.2%)                | 136 (70.8%)               |
| 4. Have you lost interest in things?                         | 0 (0.0%)       | 56 (29.2%)                | 136 (70.8%)               |
| 5. Have you worried about going crazy or 'losing your mind'? | 0 (0.0%)       | 49 (25.5%)                | 143 (74.5%)               |
| 6. Have you had a lot of trouble sleeping?                   | 0 (0.0%)       | 80 (41.7%)                | 112 (58.3%)               |
| 7. Have you felt very fearful?                               | 0 (0.0%)       | 63 (32.8%)                | 129 (67.2%)               |
| 8. Have you felt very trapped or caught?                     | 0 (0.0%)       | 60 (31.2%)                | 132 (68.8%)               |
| 9. Have you had a lot of pain in your body?                  | 2 (1.0%)       | 63 (32.8%)                | 129 (67.2%)               |
| 10. Have you felt very worthless?                            | 5 (2.6%)       | 56 (29.2%)                | 136 (70.8%)               |

<sup>a</sup> 8-item subscale<sup>b</sup> Percentages based on  $N = 192$
